# Supplementary material for: Impaired LXRα Phosphorylation Attenuates Progression of Fatty Liver Disease
Source: PubMed Central journal article supplement (PMC6344342; doi:10.1016/j.celrep.2018.12.094), 2019-01-22
Supplement: mmc1.pdf [file mmc1.pdf]

## Supplemental Information

### Impaired LXR $\alpha$ Phosphorylation Attenuates

### Progression of Fatty Liver Disease

**Natalia Becares, Matthew C. Gage, Maud Voisin, Elina Shrestha, Lucia Martin-Gutierrez, Ning Liang, Rikah Louie, Benoit Pourcet, Oscar M. Pello, Tu Vinh Luong, Saioa Goñi, Cesar Pichardo-Almarza, Hanne Røberg-Larsen, Vanessa Diaz-Zuccarini, Knut R. Steffensen, Alastair O'Brien, Michael J. Garabedian, Krista Rombouts, Eckardt Treuter, and Inés Pineda-Torra**

**Figure S1. Related to Figures 1 & 2**

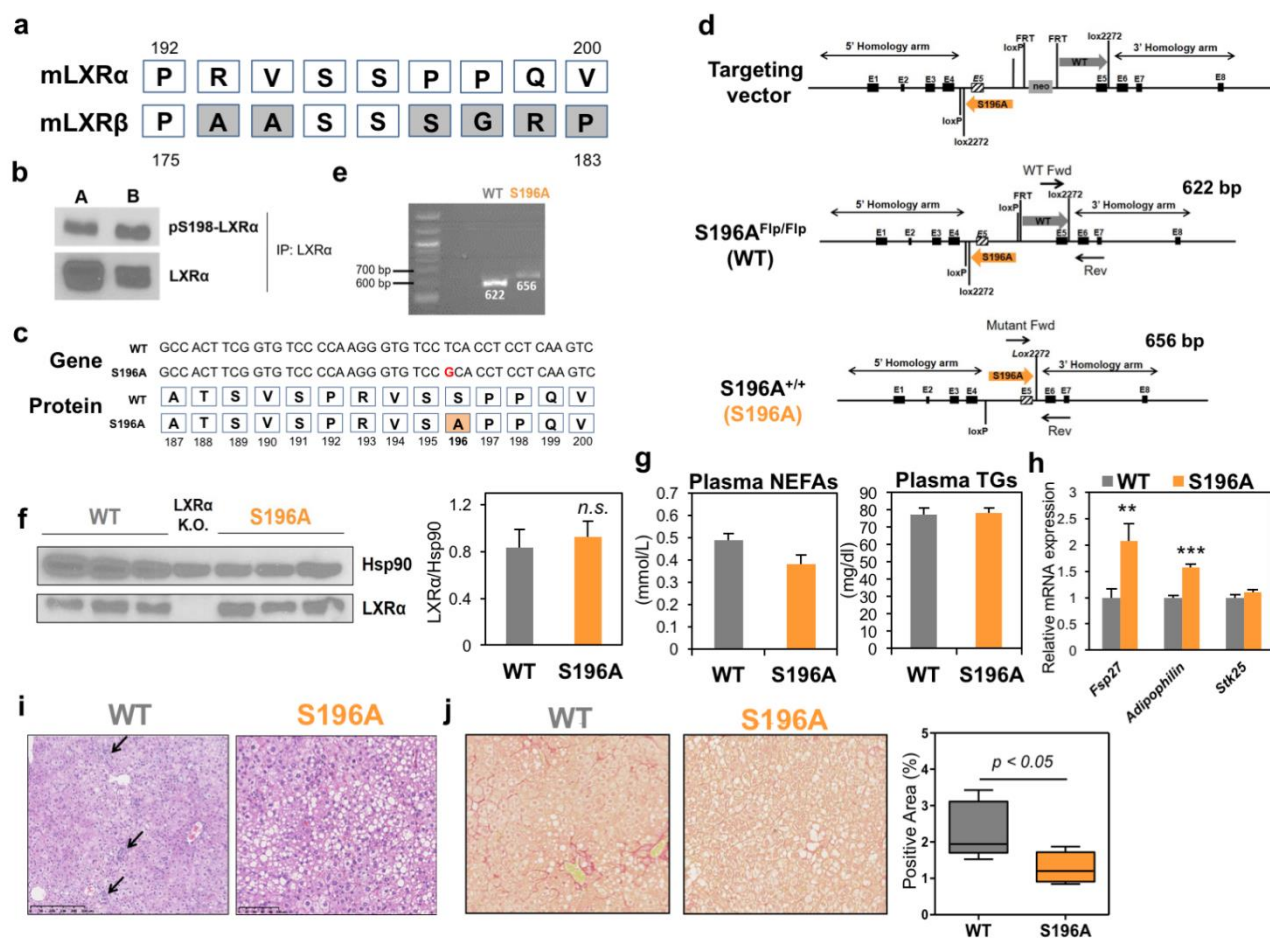

(a) Alignment of the murine LXR $\alpha$  and LXR $\beta$  showing differences in S196 phosphorylation motifs. (b) LXR $\alpha$  phosphorylation at Ser198 and total LXR $\alpha$  levels in human liver lysates (n=2) by immunoblotting. (c) WT and S196A genomic and protein sequence alignment of the murine LXR $\alpha$  depicting the single-site mutation at S196A. (d) Targeting construct containing the loxP and FRT sites, the predicted homologous recombinant alleles and the resulting WT and LXR $\alpha$  knock-in locus incorporating the mutated sequence. Diagram also shows oligos used for genotyping and product size. (e) Gel electrophoresis of DNA amplified products using the corresponding primers. (f) Total LXR $\alpha$  and Hsp90 detected by immunoblotting in WT, S196A and LXR $\alpha$  knock-out livers. Densitometry quantification on LXR $\alpha$  levels normalised to Hsp90 loading control (n=3). (g) Plasma non-esterified fatty acids (NEFAs) and triglycerides (TGs) levels from WT and S196A mice on HFHC diet (n=5-6). Data are means  $\pm$  SEM. (h) Hepatic gene expression of lipid droplet proteins from WT or S196A mice (n=6). Results shown normalized to cyclophilin and relative to WT set as 1. Data represents means  $\pm$  SEM. \* p < 0.05 or \*\* p < 0.005 relative to WT determined by Student's t-test. (i) Representative image of H&E-stained liver of WT and S196A mice fed a HFHC diet for 6 weeks. Arrows are pointing several inflammatory loci in WT liver. Scale bar at 50  $\mu$ m. (j) Representative images of Picrosirius Red-stained liver sections from WT and S196A mice on a HFHC diet for 12 weeks. Images are at 200x magnifications. Quantification of Picrosirius red-stained areas on three independent areas per section (n=6). Data represent means  $\pm$  SEM.

**Figure S2. Related to Figures 2 & 3.**

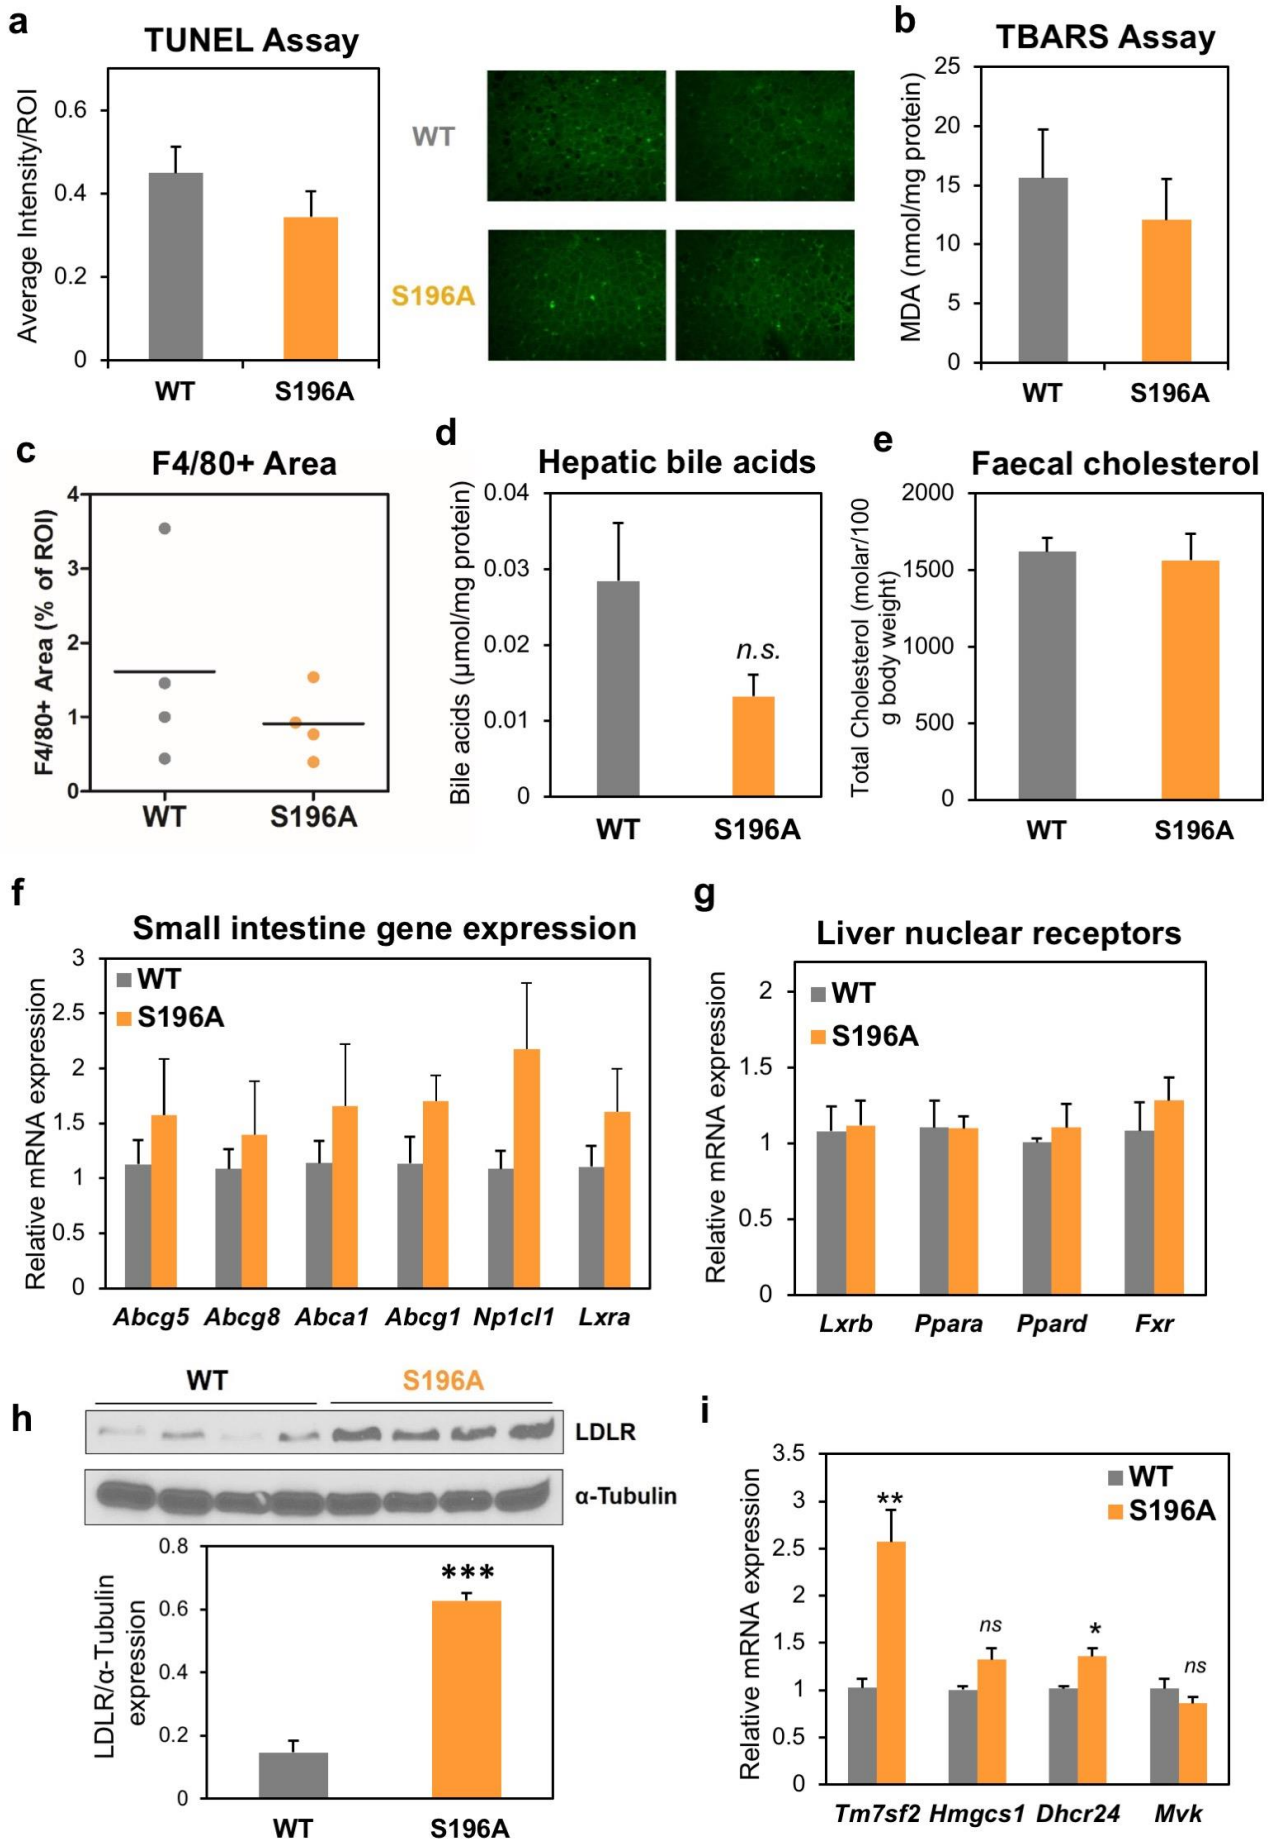

**(a)** Hepatic cell apoptosis assessed *in situ* by Direct DNA Fragmentation (TUNEL) Assay (n=6/group) (*Right*). Representative images of TUNEL-stained liver sections from WT and S196A mice at 200x magnification (*Left*). **(b)** Hepatic lipid peroxidation shown as MDA levels in WT and S196A livers (n=6) normalised to protein levels in tissue homogenates. **(c)** Quantification of F4/80-positively stained areas in liver sections of WT and S196A mice (n=4) at 200x magnification. Dots represent average of three independent areas per animal. **(d)** Hepatic bile acid levels from WT and S196A mice fed a HFHC diet for 6 weeks (n=6). Values normalized to protein levels in liver homogenates. **(e)** Total cholesterol levels of faeces from WT and S196A mice (n=4). Values are shown per 100 g of dried faeces and normalized to animal body weight. **(f)** Small intestine and **(g)** **(i)** hepatic gene expression from WT or S196A mice fed a HFHC diet for 6 weeks (n=6). Results shown normalized to cyclophilin levels and relative to WT. **(h)** LDL-Receptor (LDLR) and  $\alpha$ -Tubulin levels detected by immunoblotting in WT and S196A livers. Densitometry was performed on the levels of LDLR and normalised to the levels of the housekeeping  $\alpha$ -Tubulin (n=4). Data represent means  $\pm$  SEM. \*  $p < 0.05$  or \*\*  $p < 0.005$  relative to WT determined by Student's t-test.

**Figure S3. Related to Figure 4.**

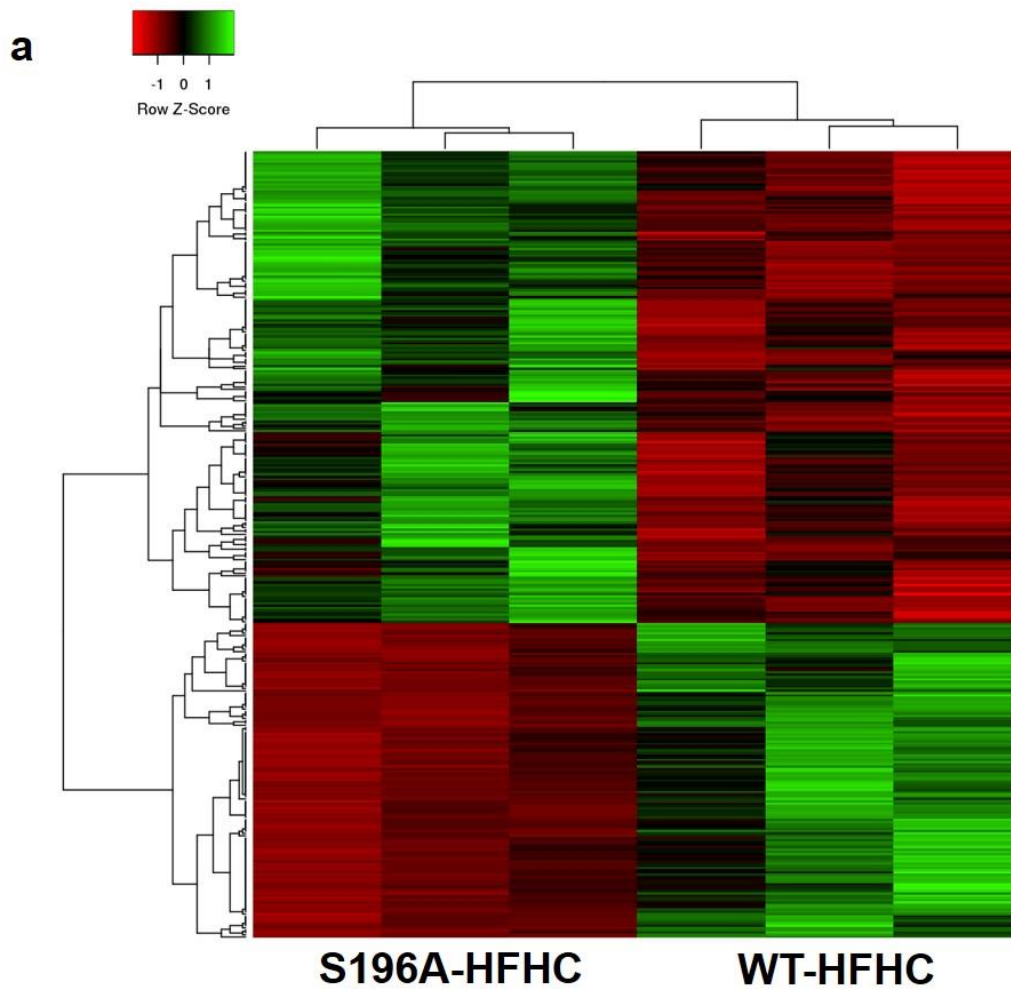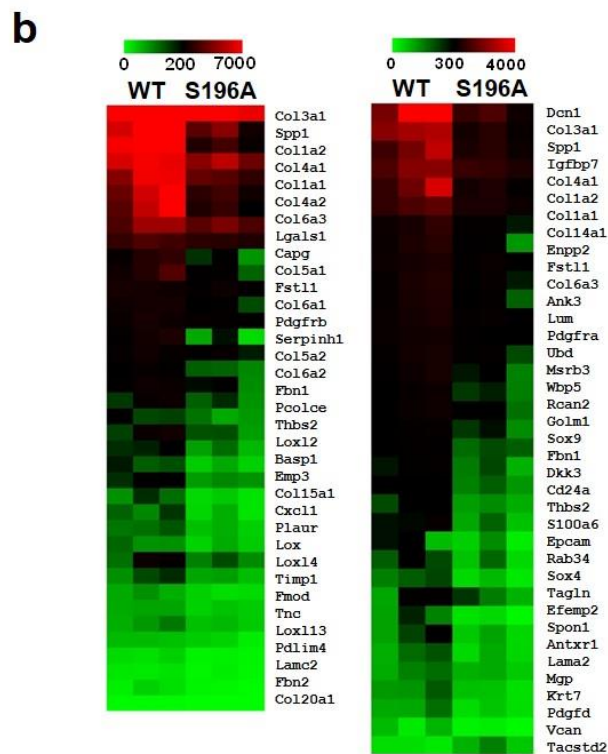

**(a)** Clustered heatmap of hepatic RNAseq normalised gene counts in WT and S196A mutant mice (n=3/genotype) of regulated genes in response to a HFHC diet. **(b)** Heatmaps of hepatic RNAseq normalised gene counts (n=3/genotype) for fibrosis (left) and mouse hepatic expression of genes previously identified to be part of a signature that distinguishes human NAFLD (right).

**Figure S4. Related to Figure 4.**

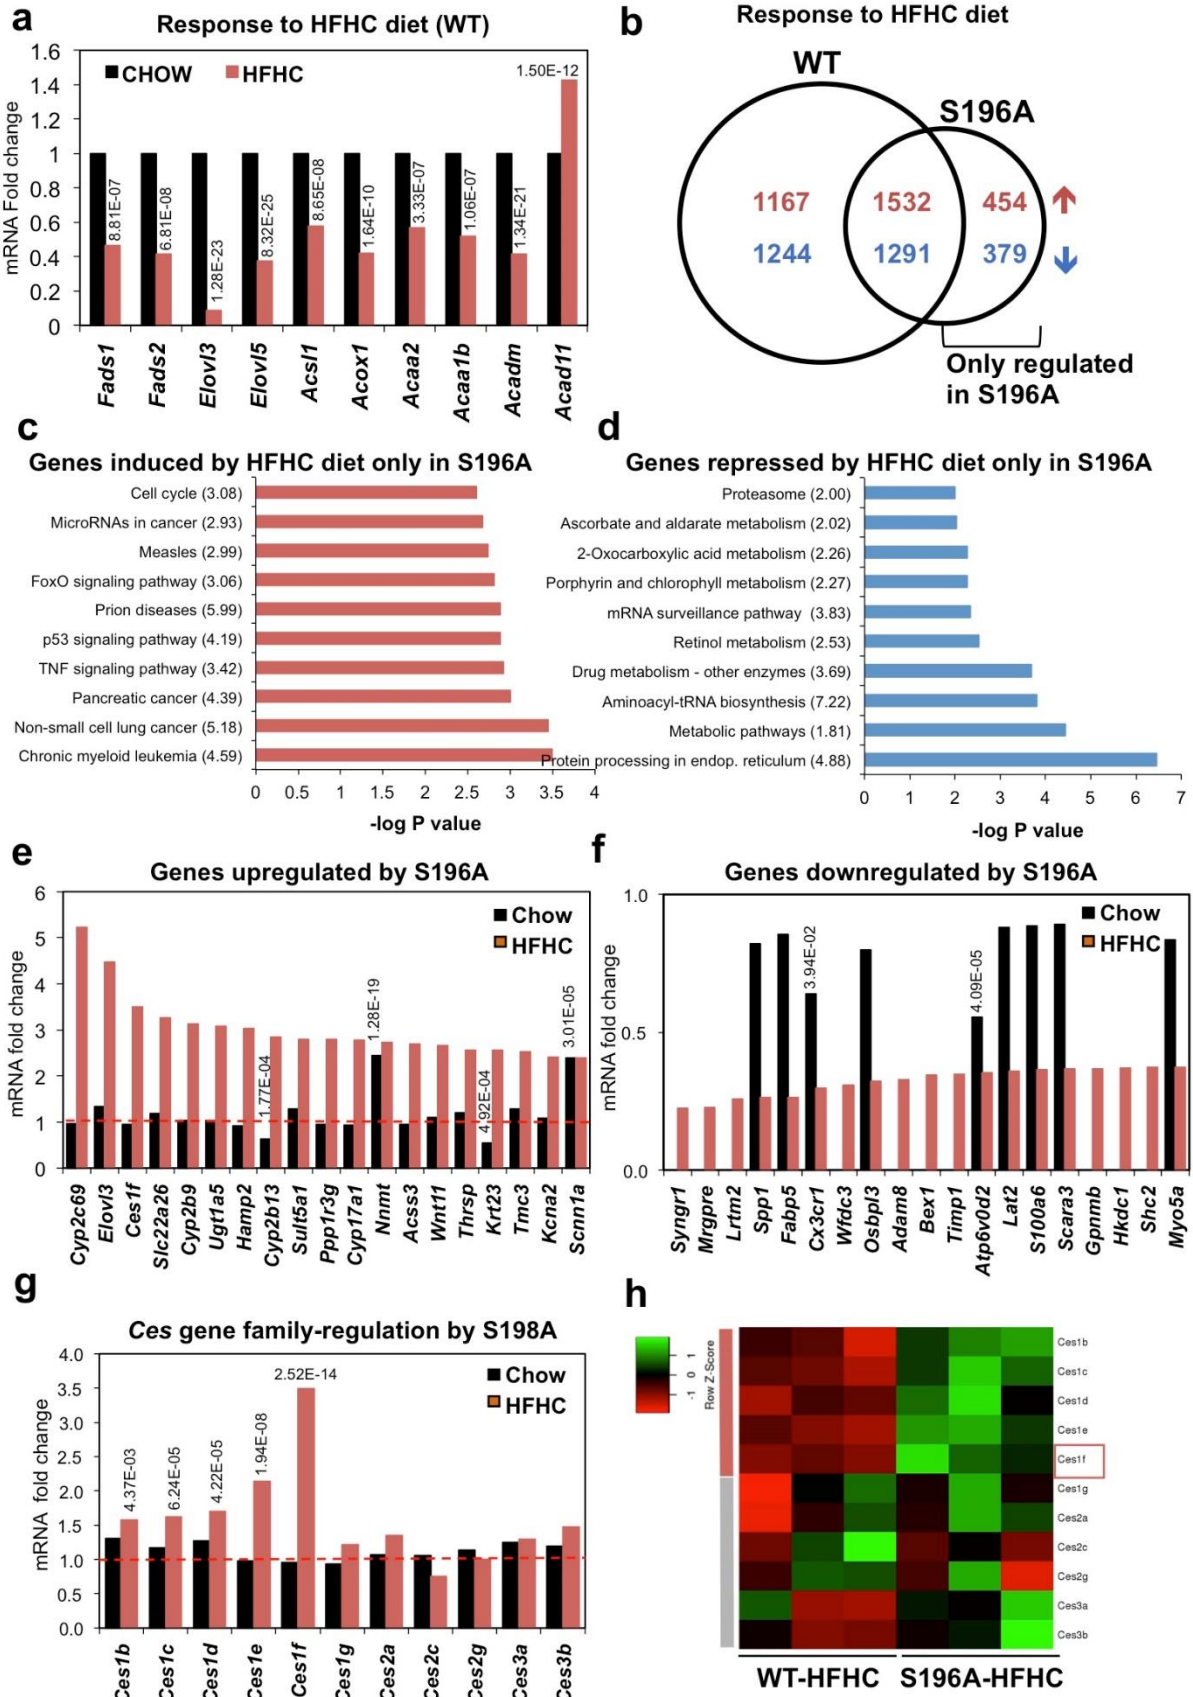

**(a)** Fold change of hepatic RNAseq gene counts of fatty acid genes in response to the HFHC diet compared to chow (set as 1) in WT mice (n=3/group). Adjusted *p* values (FDR 0.05) are shown. **(b)** Venn diagram of genes induced (red) or reduced (blue) in response to HFHC diet in WT or S196A mice. Significance set at  $p \leq 0.05$ . **(b,c)** Pathway analysis considering group of genes induced **(b)** or repressed **(c)** by HFHC diet only in S196A mice. Bar graphs shows top ten KEGG Pathways with enrichment score between brackets. **(d)** Fold change of hepatic RNAseq normalised gene counts of top upregulated genes in S196A compared to WT mice (from Fig. 4) on chow or HFHC diet (n=3/genotype). Shown are *p* values of genes differentially expressed between WT and S196A mice on chow. All genes shown are significantly regulated on the HFHC diet ( $p < 0.05$ ). Red bar set at fold change=1 indicates no change in gene expression between WT and S196A mice. **(e)** Fold change of hepatic RNAseq normalised gene counts of top downregulated genes in S196A compared to WT mice (from Fig. 4) fed chow or HFHC diet (n=3/genotype). For gene expression on chow, *p* values of genes differentially expressed between WT and S196A are shown. Data is not shown for those genes minimally expressed in chow. For gene expression on the HFHC diet, all genes depicted are significantly reduced ( $p < 0.05$ ). **(g)** Fold change of hepatic RNAseq normalised gene counts for Ces gene family members comparing WT and S1986A genotypes by diet (n=3/group). Shown are *p* values of genes differentially expressed on a HFHC diet. Red bar set at fold change=1 indicates no change in gene expression between WT and S196A mice. **(h)** Heatmap of hepatic RNAseq normalised gene counts in WT and S196A mutant mice (n=3/genotype) of Ces family genes on a HFHC diet. Red and grey bars indicate positively regulated or unchanged genes, respectively. Highest regulated Ces member (Ces1f) is shown boxed.



**Figure S5. Related to Figure 5.**

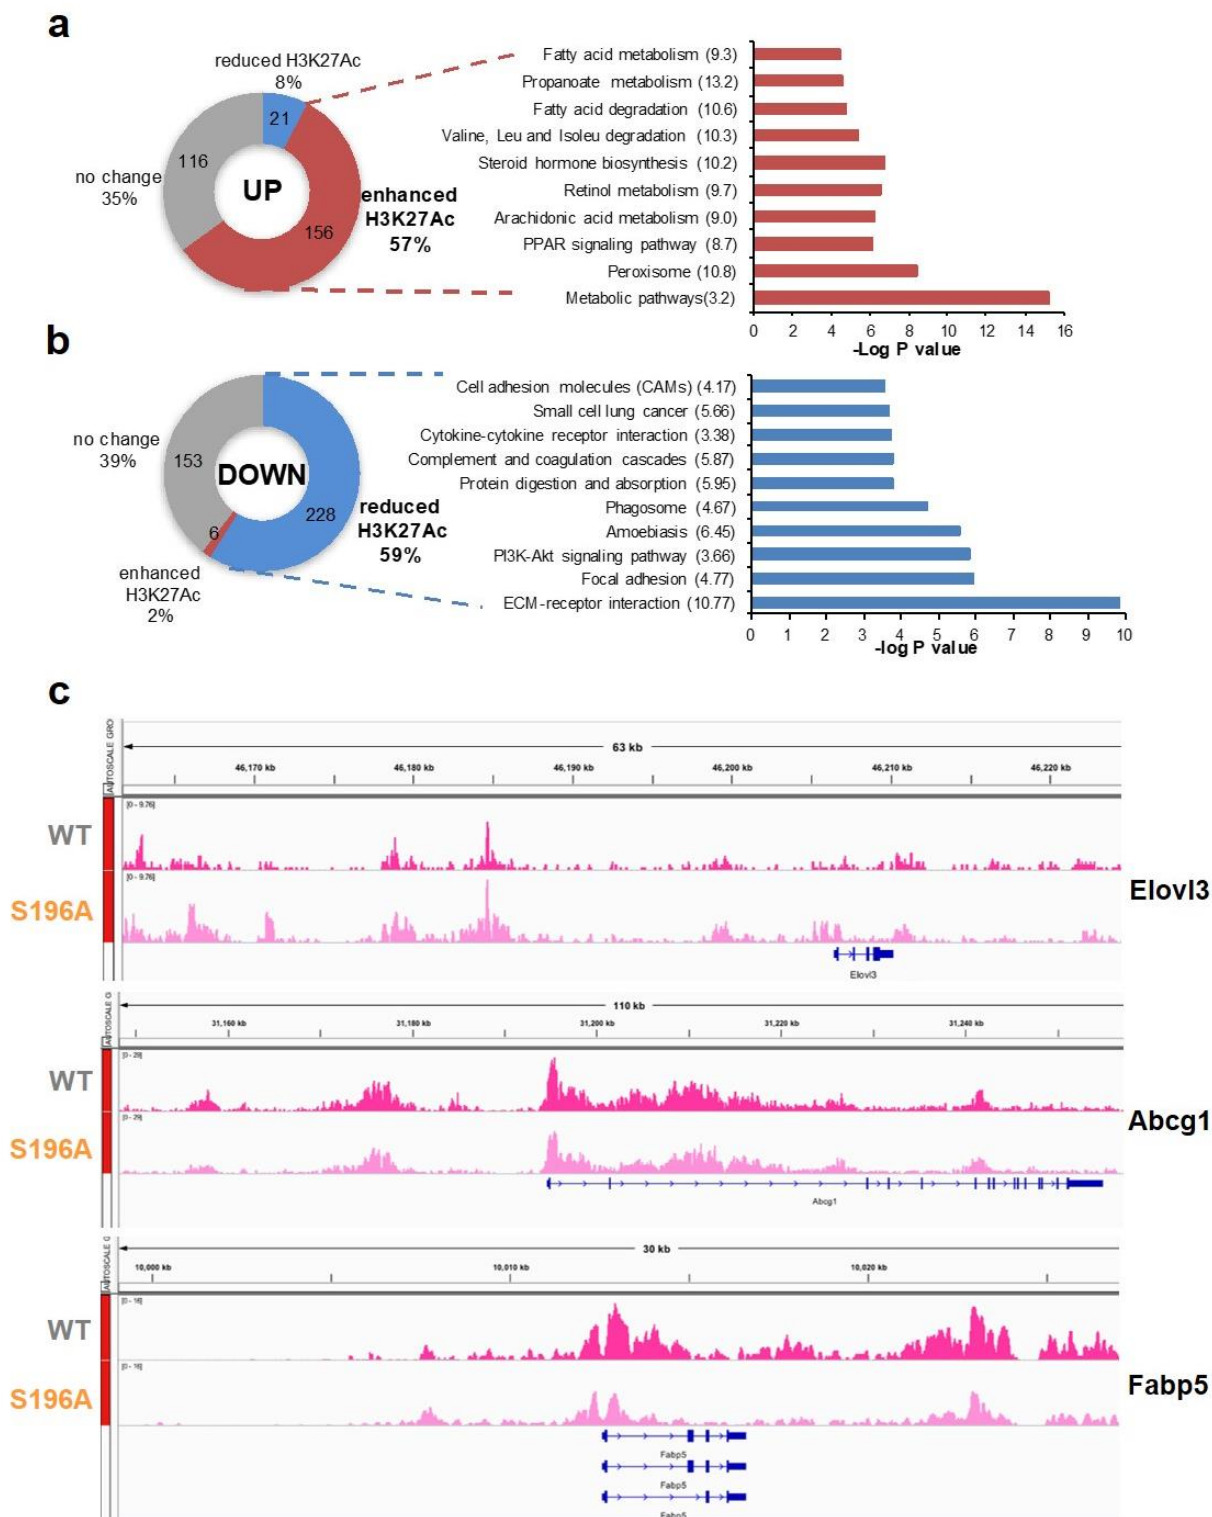

**(a-b)** Proportion of genes that are up-(a) or down- (b) regulated in S196A vs WT fatty livers showing changes in H3K27Ac by ChIPseq analysis. Number of genes are shown inside the graph. Bar graphs shows top ten KEGG Pathways (FDR<0.05) with enrichment scores between brackets. **(c)** Representative H3K27Ac ChIP-seq read alignment tracks in WT and S196A HFHC-fed livers for up-regulated (*Elov13*) and down-regulated (*Abcg1* and *Fabp5*) genes in S196A livers.

**Figure S6. Related to Figure 6.**

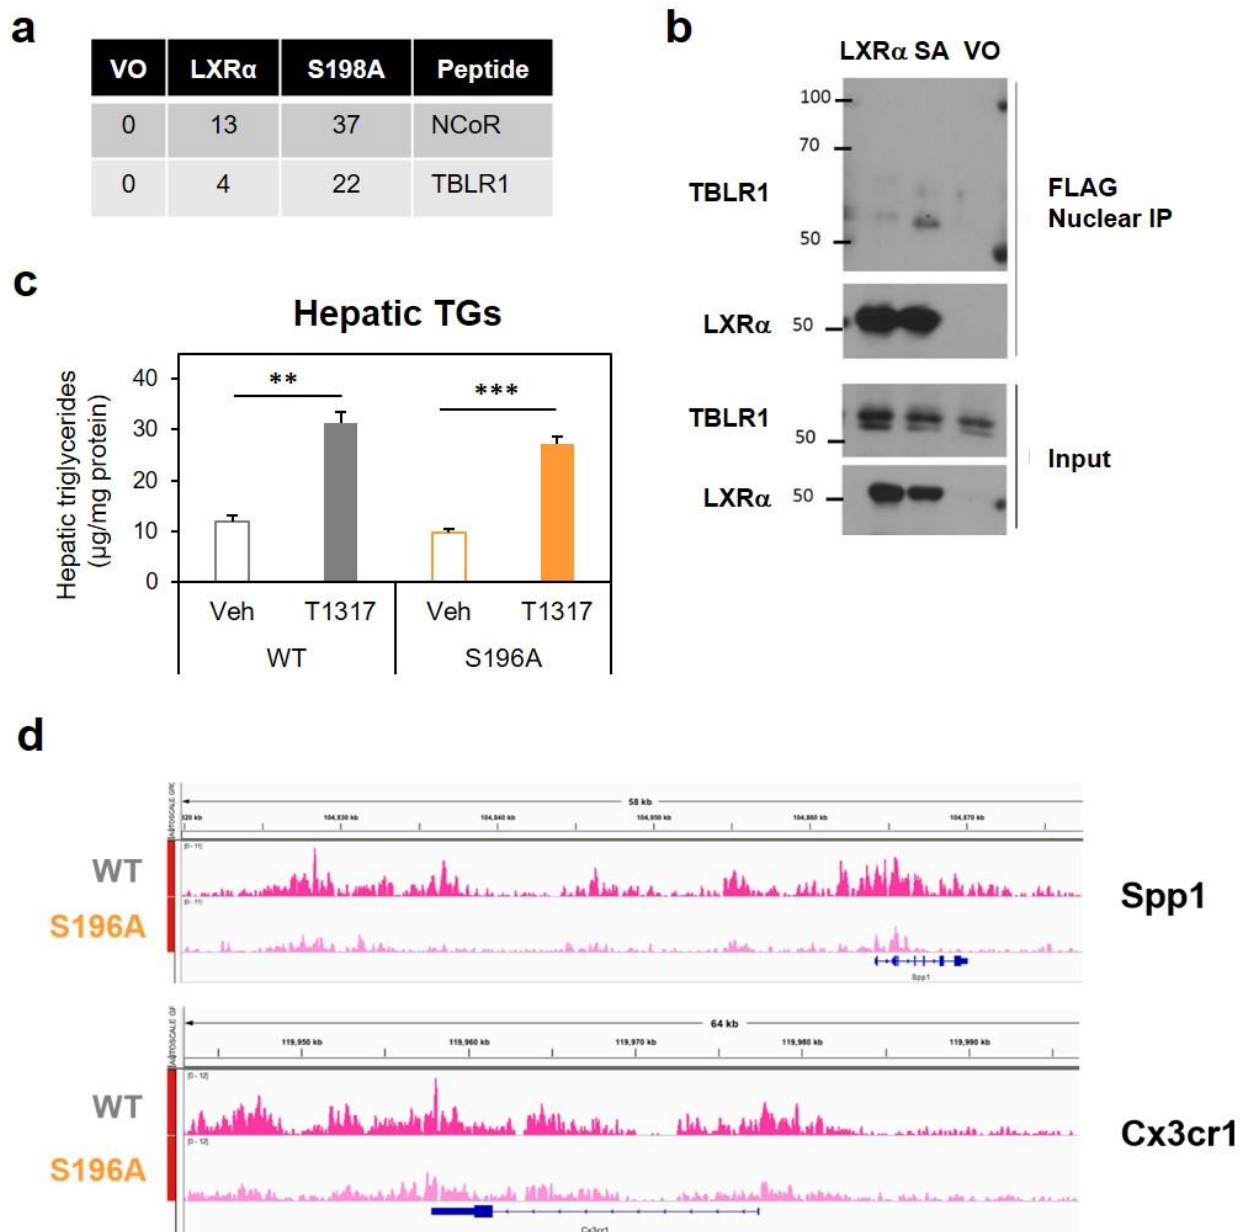

**(a)** Total spectral counts obtained from immunoprecipitates of wild-type human LXR $\alpha$  (LXR $\alpha$ ), phospho-mutant (S198A) and control cells (expressing only the empty retroviral vector, VO) identified by mass spectroscopy. **(b)** Immunoprecipitation assays with cells expressing FLAG-tagged wild-type human LXR $\alpha$  (LXR $\alpha$ ) and S198A (SA) mutant or vector only (VO). Wild-type and mutant LXR $\alpha$  were immunoprecipitated with anti-FLAG agarose beads followed by immunoblotting with specific TBLR1 antibodies. Expression of TBLR1 and LXR $\alpha$  in protein extracts prior to immunoprecipitation analysis (input) are shown. **(c)** Hepatic triglycerides (TGs) from WT and S196A mice treated with vehicle (Veh) or 50 mg/kg T0901317 (T1317). Values shown normalised to protein levels. **(d)** Representative H3K27Ac ChIP-seq read alignment tracks in WT and S196A HFHC-fed livers for genes shown to be reduced in S196A mice.

**Table S1. Related to Figure 1.**

Biometric and metabolic parameters of mice fed a chow diet.

| Parameter                                            | Genotype | Mean $\pm$ SEM     | <i>p</i> |
|------------------------------------------------------|----------|--------------------|----------|
| Body weight<br>(grams)                               | WT       | 23.63 $\pm$ 0.6    | 0.132    |
|                                                      | S196A    | 21.70 $\pm$ 0.75   |          |
| % Liver weight<br>(Liver g/Body g)                   | WT       | 4.69 $\pm$ 0.25    | 0.241    |
|                                                      | S196A    | 4.41 $\pm$ 0.07    |          |
| Plasma glucose<br>(mmol/L)                           | WT       | 5.35 $\pm$ 0.10    | 0.268    |
|                                                      | S196A    | 4.63 $\pm$ 0.22    |          |
| Plasma insulin<br>(ng/ mL)                           | WT       | 0.34 $\pm$ 0.05    | 0.103    |
|                                                      | S196A    | 0.87 $\pm$ 0.24    |          |
| Hepatic triglycerides<br>( $\mu$ g / mg protein)     | WT       | 51.95 $\pm$ 5.06   | 0.116    |
|                                                      | S196A    | 37.63 $\pm$ 4.50   |          |
| Hepatic total cholesterol<br>( $\mu$ g / mg protein) | WT       | 98.96 $\pm$ 10.48  | 0.688    |
|                                                      | S196A    | 104.43 $\pm$ 4 .05 |          |

**Table S2. Related to Figure 1.**

Biometric and metabolic parameters of mice fed a high fat and high cholesterol diet.

| Parameter                                           | Genotype | Mean $\pm$ SEM     | p-value         |
|-----------------------------------------------------|----------|--------------------|-----------------|
| Body weight<br>(grams)                              | WT       | 21.36 $\pm$ 0.41   | <b>0.012</b>    |
|                                                     | S196A    | 19.89 $\pm$ 0.35   |                 |
| % Liver weight<br>(Liver g/Body g)                  | WT       | 9.30 $\pm$ 0.17    | <b>3.06E-12</b> |
|                                                     | S196A    | 6.41 $\pm$ 0.18    |                 |
| Plasma glucose<br>(mmol/L)                          | WT       | 4.49 $\pm$ 0.30    | 0.762           |
|                                                     | S196A    | 4.61 $\pm$ 0.24    |                 |
| Plasma insulin<br>(ng/ mL)                          | WT       | 0.60 $\pm$ 0.10    | 0.498           |
|                                                     | S196A    | 0.87 $\pm$ 0.33    |                 |
| Hepatic triglycerides<br>( $\mu$ g/ mg protein)     | WT       | 106.66 $\pm$ 10.04 | <b>0.033</b>    |
|                                                     | S196A    | 170.41 $\pm$ 23.85 |                 |
| Hepatic total cholesterol<br>( $\mu$ g/ mg protein) | WT       | 207.79 $\pm$ 23.28 | <b>0.00006</b>  |
|                                                     | S196A    | 53.33 $\pm$ 2.76   |                 |

**Table S3. Related to STAR Methods.**

|             | <b><u>Forward primer</u></b> (5' to 3') | <b><u>Reverse primer</u></b> (5' to 3') |
|-------------|-----------------------------------------|-----------------------------------------|
| Adipophilin | GACCGTGC GGACTTGCTC                     | GCCATTTTTTCTCCTGGAGA                    |
| Abca1       | GGACATGCACAAGGTCCTGA                    | CAGAAAATCCTGGAGCTTCAAA                  |
| Abcg1       | CCTTCCTCAGCATCATGCG                     | CCGATCCCAATGTGCGA                       |
| Abcg5       | TGGATCCAACACCTCTATGCTAAA                | GGCAGGTTTTCTCGATGAACTG                  |
| Abcg8       | TGCCACCTTCCACATGTC                      | ATGAAGCCGGCAGTAAGGTAGA                  |
| a-Sma       | CCCAGACATCAGGGAGTAATGG                  | TCTATCGGATACTTCAGCGTCA                  |
| Atf3        | GAGGATTTTGCTAACCTGACACC                 | TTGACGGTAACTGACTCCAGC                   |
| Atp6v0d2    | GTGCAGTGTGAGACCTTGGGA                   | GCCAGGAAGTTGCCATAGTC                    |
| Bex1        | ATGGAGTCCAAAGATCAAGGCG                  | CTGGCTCCCTTCTGATGGTA                    |
| Cd36        | GCCAAGCTATTGCGACATGA                    | TCTCAATGTCCGAGACTTTTCAAC                |
| Ces1f       | TGGAGAGTCAGCAGGAGGTT                    | ATGAAGGCCACACCACTCTC                    |
| Chop        | CTGGAAGCCTGGTATGAGGAT                   | CAGGGTCAAGAGTAGTGAAGGT                  |
| Col1a1      | GCTCCTCTTAGGGGCCACT                     | CCACGTCTCACCATTGGGG                     |
| Cyclophilin | GGCCGATGACGAGCCC                        | TGTCCTTTGGAACCTTGTCTGCAA                |
| Cyp17a1     | ACCAGCCAGATCGGTTTATG                    | AGGGCAAATAACTGGGTGTG                    |
| Cyp2b13     | ATGCTCATGTACCCCATGT                     | GCCGATCACCTGATCAATCT                    |
| Cyp2b9      | CTGGCCACCATGAAAGAGTT                    | CATTGGGCCTCCTCCTTTAT                    |
| Cyp2c69     | CACAGTGGCTCATGAAGGAA                    | GATGAATTGGGGATCACAGG                    |
| Cyp7a1      | CATACCTGGGCTGTGCTCTG                    | CCAAATGCC TTCGCAGAAGATG                 |
| Cx3cr1      | TGAGTGACTGGCACTTCCTG                    | AAGGAGGTGGACATGGTGAG                    |
| Dgat2       | CTGGCTGATAGCTGCTCTCTACTT                | TGTGATCTCCTGCCACCTTTC                   |
| Elovl6      | TGAACAAGCGAGCCAAGTTTG                   | GAGCACCGAATACTGAAGACG                   |
| Fabp5       | AGGATGGGAAGATGATCGTG                    | CTGGCAGCTAACTCCTGTCC                    |
| Fas         | GCTGCGGAAACTTCAGGAAAT                   | AGAGACGTGTCACTCCTGGACTT                 |
| Fsp27       | GTGTCCACTTGTGCCGTCTT                    | CTCGCTTGGTTGTCTTGATT                    |
| Hamp2       | AGAAAGCAGGGCAGACATTG                    | GCAGATGGGGAAGTTGATGT                    |
| Idol        | ATGCTGTGCTATGTCACGAGG                   | TCGATGATCCCTAGACGCCTG                   |
| Ldlr        | GCATCAGCTTGGACAAGGTGT                   | GGGAACAGCCACCATTGTTG                    |
| L-Fabp      | ATGAACTTCTCCGGCAAGTACC                  | CTGACACCCCCTTGTATGTCC                   |
| Lpcat3      | CCTTCACGGGCCTCTCAATT                    | CCATGAGTCGCAGGATGAGG                    |
| Lxra        | GGTTGCTTTAGGGATAGGGTT                   | TTCCGCTTTTGTGGACGAAG                    |
| Nnmt        | TGTGCAGAAAACGAGATCCTC                   | TGTGCAGAAAACGAGATCCTC                   |
| Ncp111      | GAGAGCCAAAGATGCTACTATCTT                | CCCGGGAAGTTGGTCATG                      |
| Osbp13      | AGACACGGAGGAGCACATCT                    | CGGTACATTCTGTGGTGACG                    |
| Osm         | GCAGCTGTGGCTTTCTCTGG                    | TCGTCCCATTCCCTGAAGAC                    |
| Ppp1r3g     | CTGAGACCCCGATCCCTGAT                    | GAGAGCGGCGATATTCCTGT                    |
| Scara3      | GCTGGTGAAGACGAGGACAT                    | CAAAATCCGCACTGATGTGT                    |
| Scd1        | CCGGAGACCCCTTAGATCGA                    | TAGCCTGTAAAAGATTTCTGCAA                 |
| Slc22a26    | ACAGAGCCCTGTATGGATGG                    | AGATCCACACACCAGGTTCC                    |
| Srebp1c     | CAGGAGGACATC TTGCTGCTTC                 | TTGGGAGGCTGGTTTTGACC                    |
| Syng1       | CTGGTTCGTGGGTTTCTGCTT                   | GTCCCTTCGTTTCAGAGGGTTG                  |
| Tgfb2       | TTTGCTCCAGACAGTCCCAG                    | ATCTCCAGACATGCCAAGCC                    |
| Timp1       | GTGGATATGCCACAAGTCC                     | CTCAGAGTACGCCAGGGAAC                    |
| Thrsp       | GCGGAAATACCAGGAAATGA                    | CGGGGTCTTCATCAGTCTTC                    |
| spl Xbp1    | GAGTCCGCAGCAGGTG                        | GTGTCAGAGTCCATGGGA                      |
| Stk25       | ACGTT CCTCCAACCATCCG                    | CTTCTGTGAGCTGTGCA                       |
| Wfdc3       | CTTGGGTAGCTGCAGGAGAG                    | ATTCGTCTCCGGTACACAGC                    |

**Table S4. Related to STAR Methods.**

|              | <b>Forward primer (5' to 3')</b> | <b>Reverse primer (5' to 3')</b> |
|--------------|----------------------------------|----------------------------------|
| Ces1f DR4    | GGTGGTGGCCATTCAATATC             | TGTCCACAAACCCTACCTGA             |
| Ces1f TSS    | CATTGACTTGGGAGCCTGTC             | ACTCACCGCAAATCACACAG             |
| Srebp1c LXRE | AGGCTCTTTTCGGGGATGG              | TGGGGTTACTGGCGGTAC               |
| Srebp1c TSS  | GTGGGCCTAGTCCGAAGC               | ATCTCGGCCAGTGTCTGTTC             |
